# Supplementary material for: Totum-070, a Polyphenol-Rich Plant Extract, Prevents Hypercholesterolemia in High-Fat Diet-Fed Hamsters by Inhibiting Intestinal Cholesterol Absorption
Source: MDPI journal article supplement (doi:10.3390/nu15245056), 2023-12-09
Supplement: s1 [file s1]

**Table S1.** List annotation of differentially expressed hepatic genes within KEGG pathways between HFD and HFD T070 5% groups using the *Cricetulus griseus*' ortholog gene identifiers.

| Pathway                                                    | Gene count | Fold enrichment | p values |
|------------------------------------------------------------|------------|-----------------|----------|
| cge01100:Metabolic pathways                                | 19         | 1.47            | 0.0744   |
| cge05010:Alzheimer disease                                 | 11         | 3.10            | 0.0024   |
| cge05022:Pathways of neurodegeneration                     | 11         | 2.60            | 0.0081   |
| cge05012:Parkinson disease                                 | 9          | 3.94            | 0.0017   |
| cge05020:Prion disease                                     | 8          | 3.49            | 0.0071   |
| cge05014:Amyotrophic lateral sclerosis                     | 8          | 2.63            | 0.0299   |
| cge05152:Tuberculosis                                      | 7          | 4.62            | 0.0037   |
| cge05208:Chemical carcinogenesis – reactive oxygen species | 7          | 3.11            | 0.0232   |
| cge05016:Huntington disease                                | 7          | 2.74            | 0.0397   |
| cge04932:Non-alcoholic fatty liver disease                 | 6          | 4.53            | 0.0097   |
| cge04140:Autophagy - animal                                | 6          | 4.19            | 0.0133   |
| cge04621:NOD-like receptor signaling pathway               | 6          | 4.15            | 0.0139   |
| cge05415:Diabetic cardiomyopathy                           | 6          | 3.36            | 0.0310   |
| cge04714:Thermogenesis                                     | 6          | 2.66            | 0.0715   |
| cge05163:Human cytomegalovirus infection                   | 6          | 2.57            | 0.0799   |
| cge04625:C-type lectin receptor signaling pathway          | 5          | 4.38            | 0.0259   |
| cge05418:Fluid shear stress and atherosclerosis            | 5          | 4.24            | 0.0288   |
| cge04723:Retrograde endocannabinoid signaling              | 5          | 4.16            | 0.0306   |
| cge04722:Neurotrophin signaling pathway                    | 5          | 4.01            | 0.0344   |
| cge04371:Apelin signaling pathway                          | 5          | 3.46            | 0.0542   |
| cge04024:cAMP signaling pathway                            | 5          | 2.93            | 0.0876   |
| cge03050:Proteasome                                        | 4          | 11.36           | 0.0050   |
| cge04924:Renin secretion                                   | 4          | 7.26            | 0.0169   |
| cge05133:Pertussis                                         | 4          | 7.06            | 0.0182   |
| cge04925:Aldosterone synthesis and secretion               | 4          | 5.28            | 0.0386   |
| cge04728:Dopaminergic synapse                              | 4          | 3.71            | 0.0904   |
| cge04936:Alcoholic liver disease                           | 4          | 3.60            | 0.0963   |
