# Supplementary material for: Totum-070, a Polyphenol-Rich Plant Extract, Prevents Hypercholesterolemia in High-Fat Diet-Fed Hamsters by Inhibiting Intestinal Cholesterol Absorption
Source: MDPI journal article supplement (doi:10.3390/nu15245056), 2023-12-09
Supplement: s1 [file s1]

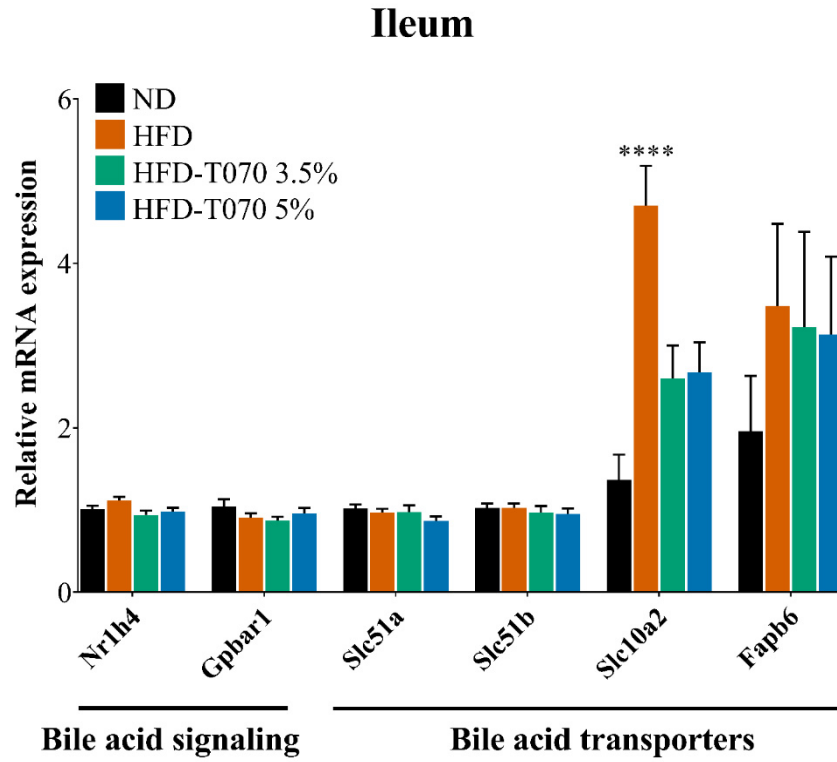

**Figure S1.** Expression of genes encoding proteins implicated in bile acid homeostasis in ileum. \*\*\*\*  $p < 0.0001$  versus ND. Data are the mean  $\pm$  SEM
