# Supplementary material for: Totum-070, a Polyphenol-Rich Plant Extract, Prevents Hypercholesterolemia in High-Fat Diet-Fed Hamsters by Inhibiting Intestinal Cholesterol Absorption
Source: MDPI journal article supplement (doi:10.3390/nu15245056), 2023-12-09
Supplement: s1 [file s1]

**Table S2.** Cecal microbiota: indicator phyla. Indicator taxa were identified as those the abundance of which differed significantly in  $\geq 2$  groups. Relative abundances are presented as the mean  $\pm$  SD. and p values were adjusted for multiple testing. n=15/16 per group. F/B: Firmicutes/Bacteroidetes.

| Phylum           | % of relative abundance |                  |                  | Adjusted p values |                   |                    |
|------------------|-------------------------|------------------|------------------|-------------------|-------------------|--------------------|
|                  | ND                      | HFD              | HFD-T070 5%      | ND vs HFD         | ND vs HFD-T070 5% | HFD vs HFD T070 5% |
| Actinobacteria   | 0.49 $\pm$ 0.21         | 0.21 $\pm$ 0.07  | 0.22 $\pm$ 0.09  | p=0.0018          | p =0.0019         | p =0.5651          |
| Elusimicrobia    | 0.06 $\pm$ 0.06         | 0.17 $\pm$ 0.17  | 0.19 $\pm$ 0.17  | p=0.0591          | p =0.0129         | p =0.5970          |
| Firmicutes       | 49.46 $\pm$ 5.15        | 42.14 $\pm$ 5.56 | 32.55 $\pm$ 4.33 | p =0.0018         | p =0.0001         | p =0.0194          |
| Campilobacterota | 0.17 $\pm$ 0.15         | 0.53 $\pm$ 0.45  | 0.85 $\pm$ 0.76  | p =0.0455         | p =0.0001         | p =0.3344          |
| Deferribacteres  | 0.26 $\pm$ 0.15         | 0.58 $\pm$ 0.33  | 0.90 $\pm$ 0.53  | p =0.0107         | p =0.0001         | p =0.1000          |
| Proteobacteria   | 10.23 $\pm$ 2.24        | 14.74 $\pm$ 2.70 | 14.54 $\pm$ 1.52 | p =0.0018         | p =0.0001         | p =0.5651          |
| Bacteroidetes    | 34.63 $\pm$ 3.75        | 34.94 $\pm$ 5.15 | 42.90 $\pm$ 4.76 | p =0.6353         | p =0.0002         | p =0.0004          |
| uncl. Bacteria   | 3.99 $\pm$ 1.11         | 4.55 $\pm$ 1.20  | 6.83 $\pm$ 1.99  | p =0.4956         | p =0.0001         | p =0.0023          |
| F/B ratio        | 1.46 $\pm$ 0.32         | 1.24 $\pm$ 0.29  | 0.78 $\pm$ 0.19  | p =0.0753         | p =0.0000         | p =0.0001          |
