# Supplementary material for: Totum-070, a Polyphenol-Rich Plant Extract, Prevents Hypercholesterolemia in High-Fat Diet-Fed Hamsters by Inhibiting Intestinal Cholesterol Absorption
Source: MDPI journal article supplement (doi:10.3390/nu15245056), 2023-12-09
Supplement: s1 [file s1]

**Table S4.** List of hamster primers used for qPCR.

| Gene           | Primers                                                          |
|----------------|------------------------------------------------------------------|
| <i>Abcb1</i>   | Forward: TTCGCTATGGCCGAGAAGAC<br>Reverse: TCTCACCGACCAGAGTGTC    |
| <i>Abcb11</i>  | Forward: ATCTGGGAAGAGCACAGCAC<br>Reverse: CCGGATGTTGAGAGAGCGAA   |
| <i>Abcg5</i>   | Forward: CGTGGCAGACCGAATGATTG<br>Reverse: GTCCTGTGGTTGGCTCATCA   |
| <i>Abcg8</i>   | Forward: GCAACCCCGCTGACTTCTAT<br>Reverse: TCATCGAAGCCTCGCACTTT   |
| <i>Acaca</i>   | Forward: TTAACAGCGGCAGAGTCAGG<br>Reverse: GAAGCTCAGCCTGTTGGACT   |
| <i>Acox1</i>   | Forward: TGGCTGTTAAGAAGAGTGCCA<br>Reverse: GTAATTGAGGCCACAGGCT   |
| <i>Adgre1</i>  | Forward: GCTTCCAACCAGAGCCAGAA<br>Reverse: CCTGCTTGGCACTGCTGTAT   |
| <i>Angptl3</i> | Forward: ACGGTTTTGGAAGATTTGCGG<br>Reverse: TGCTTGCTGTCTTTGCAGTC  |
| <i>Apob</i>    | Forward: ATTCTGCCAGCGCAACCTAT<br>Reverse: GACAAAGTCCTGCTTTGCCG   |
| <i>Apoc3</i>   | Forward: TAATGAGGTAGAGGGGTCTTG<br>Reverse: GTAGCTTTTCAGGGAGGTGA  |
| <i>Ccl2</i>    | Forward: AACGCTTCTGTGCCTACTGC<br>Reverse: TCTTGTAGCTCTCCAGCCTCT  |
| <i>Cidec</i>   | Forward: TACGACTTGCACTGCTACCG<br>Reverse: TCAGTGGCATCCAGGAAGTGA  |
| <i>Cldn1</i>   | Forward: TGTGGATGTCCTGCGTTTCG<br>Reverse: TGCGATCAGTCCCAGAAGGA   |
| <i>Cldn2</i>   | Forward: ACGGGCTCCGAAGAGACTTA<br>Reverse: ATGCTGGCACCAACGTAAGA   |
| <i>Cpt1a</i>   | Forward: TTATCGTGGTGGTGGGTGTG<br>Reverse: ATGCCACTCACGACGTTCTT   |
| <i>Cyp7a1</i>  | Forward: GGAGCATTACAGAGTGCTGGT<br>Reverse: AGGATGCACTGGAAAGCCTC  |
| <i>Cyp27a1</i> | Forward: AGGAGGGCAAGTACCCCATTA<br>Reverse: TGATGCCCTTGCGTGAGAAA  |
| <i>Cyp8b1</i>  | Forward: AGTTCCGCAGGTTTGACCTC<br>Reverse: ATGCCGTCTTTCTGCAGGTT   |
| <i>Fabp6</i>   | Forward: GGCAACCTTCCCCAACTATCA<br>Reverse: AAGCCAGCCTCTTGCTTACA  |
| <i>Fasn</i>    | Forward: CACAGTGCTCCGAGGTCATT<br>Reverse: CACCAGGTGCAATCCCTTCT   |
| <i>Gpbar1</i>  | Forward: AGAAAAGCCCAGCTAACAAGC<br>Reverse: TGTGCGGTGTCATCATGGGTC |
| <i>Hmgcr</i>   | Forward: GCAGATACTGGAGAGTGCCG<br>Reverse: GCTGCCGGCGAATAGATACA   |
| <i>Il1b</i>    | Forward: GCAACTGTTCTGAACTCGAC<br>Reverse: TGGATAGCTCAGGTCAAGGCT  |

|                |                                                                    |
|----------------|--------------------------------------------------------------------|
| <i>Il6</i>     | Forward: CCTGGAGTTTGTGACGAACAAT<br>Reverse: GTTGGGCTAGGCGTGACTATT  |
| <i>Ldlr</i>    | Forward: CTCCACTCTATCTCCAGCATTG<br>Reverse: TTTCAGCCACCAAATTCACATC |
| <i>Lpl</i>     | Forward: TTGTGATCCATGGCTGGACG<br>Reverse: ATCCACCACGATGACGTTGG     |
| <i>Mttp</i>    | Forward: ATTCAGCTGCAATCTGGACTAA<br>Reverse: ACGAAAGAAGAGTCCACTGTGA |
| <i>Npc1l1</i>  | Forward: ATGGCCACTCACTGTCTTGG<br>Reverse: CGTCGTGGAAAGCCTTCTCT     |
| <i>Nr1h4</i>   | Forward: AGGTTAGCCTTCAACCACAGC<br>Reverse: CGCCTCCAAATCCAGGTTCT    |
| <i>Ocln</i>    | Forward: AGTGGATGGCAAGCGATCAT<br>Reverse: TACCACTGCTGCTGTACCGA     |
| <i>Pcsk9</i>   | Forward: TGCTCCAGAGGTCATCACAG<br>Reverse: GTCCCACTCTGTGACATGAAG    |
| <i>Polr2a</i>  | Forward: AGGAACACATGCCACCTTTCA<br>Reverse: GAAATGGGAATGTCACACAGCA  |
| <i>Ppara</i>   | Forward: GCGCTGAACATTGAGTGTCTG<br>Reverse: ACGCCAGCTTTAGCCGAATA    |
| <i>Slc10a1</i> | Forward: CTCAAGACCAAAAAGGCCACAG<br>Reverse: TGTCATGGCGAACTTGATGC   |
| <i>Slc10a2</i> | Forward: TCACAAATGGCCCCAAAAAGC<br>Reverse: GGTTCAATGGTCCAGGCACT    |
| <i>Slc51b</i>  | Forward: AGAGTTTCGTGCAAAGACTGC<br>Reverse: CCTGCTCCTGGTTGAGATGTT   |
| <i>Slc51a</i>  | Forward: CTGGAGCTGCTGAAAACCAAC<br>Reverse: GTCAAGATGATGGTGAGGGCA   |
| <i>Slco1a5</i> | Forward: CATGGACAGAGTGTGATTTTGGT<br>Reverse: TGCTACCCCCAATGCTTTGAA |
| <i>Srebf1</i>  | Forward: TTGAGGATAGCCAGGTGAAAGC<br>Reverse: ACAGTGATGCCAAGGGGTTG   |
| <i>Srebf2</i>  | Forward: GAGAGCTGTGAATTTTCCAGTG<br>Reverse: CTACAGATGATATCCGGACCAA |
| <i>Tgfb1</i>   | Forward: ATTCGGGAAGCAGTGCCTGA<br>Reverse: ACGCCAGGTATTGTTGCTGT     |
| <i>Tjp1</i>    | Forward: GCTGGATTCCTGAGACCTGT<br>Reverse: CCAGCATCTCGTGGTTCCT      |
| <i>Tnfa</i>    | Forward: CAACCCTATCATCGGCTCCA<br>Reverse: GCTCCTCCACTTGGTGGTTT     |

---
