# Supplementary material for: Totum-070, a Polyphenol-Rich Plant Extract, Prevents Hypercholesterolemia in High-Fat Diet-Fed Hamsters by Inhibiting Intestinal Cholesterol Absorption
Source: MDPI journal article supplement (doi:10.3390/nu15245056), 2023-12-09
Supplement: s1 [file s1]

**Table S3.** Cecal microbiota: Indicator Genera. Indicator taxa were identified as those whose abundance differ significantly between two groups or more. Relative abundances are presented as the mean  $\pm$  SD. and p values were adjusted for multiple testing. n=15/16 per group.

| Genus                           | % of relative abundance |                  |                  | Adjusted p. values |               |            |         | Total cholesterol level |               |
|---------------------------------|-------------------------|------------------|------------------|--------------------|---------------|------------|---------|-------------------------|---------------|
|                                 | ND                      | HFD              | HFD-T070 5%      | ND vs HFD          | ND vs T070 5% | HFD vs HFD | T070 5% | Pearson                 | Adj p. values |
| <i>Alloscardovia</i>            | 0.02 $\pm$ 0.01         | 0.00 $\pm$ 0.00  | 0.00 $\pm$ 0.00  | p =0.00            | p =0.00       | p =0.46    |         | -0.63                   | p =0.00       |
| <i>Bifidobacterium</i>          | 0.30 $\pm$ 0.17         | 0.09 $\pm$ 0.05  | 0.02 $\pm$ 0.03  | p =0.01            | p =0.00       | p =0.00    |         | -0.49                   | p =0.00       |
| uncl. <i>Bifidobacteriaceae</i> | 0.04 $\pm$ 0.02         | 0.02 $\pm$ 0.02  | 0.00 $\pm$ 0.01  | p =0.08            | p =0.00       | p =0.03    |         | -0.39                   | p =0.02       |
| <i>Olsenella</i>                | 0.05 $\pm$ 0.03         | 0.01 $\pm$ 0.02  | 0.00 $\pm$ 0.00  | p =0.05            | p =0.00       | p =0.07    |         | -0.45                   | p =0.01       |
| uncl. <i>Eggerthellaceae</i>    | 0.00 $\pm$ 0.01         | 0.01 $\pm$ 0.01  | 0.05 $\pm$ 0.03  | p =0.86            | p =0.00       | p =0.00    |         | 0.03                    | p =0.91       |
| <i>Adlercreutzia</i>            | 0.02 $\pm$ 0.02         | 0.01 $\pm$ 0.01  | 0.04 $\pm$ 0.03  | p =0.49            | p =0.05       | p =0.00    |         | -0.14                   | p =0.57       |
| <i>Raoultibacter</i>            | 0.00 $\pm$ 0.00         | 0.00 $\pm$ 0.00  | 0.01 $\pm$ 0.01  | p =0.49            | p =0.03       | p =0.01    |         | -0.07                   | p =0.79       |
| uncl. <i>Coriobacteriia</i>     | 0.03 $\pm$ 0.02         | 0.05 $\pm$ 0.03  | 0.08 $\pm$ 0.05  | p =0.25            | p =0.00       | p =0.14    |         | 0.11                    | p =0.60       |
| uncl. <i>Muribaculaceae</i>     | 3.23 $\pm$ 0.55         | 2.04 $\pm$ 0.72  | 3.11 $\pm$ 0.67  | p =0.01            | p =0.82       | p =0.00    |         | -0.59                   | p =0.00       |
| <i>Paramuribaculum</i>          | 0.56 $\pm$ 0.46         | 1.16 $\pm$ 0.69  | 0.51 $\pm$ 0.28  | p =0.07            | p =0.83       | p =0.01    |         | 0.38                    | p =0.03       |
| <i>Duncaniella</i>              | 6.67 $\pm$ 2.75         | 4.22 $\pm$ 2.03  | 6.11 $\pm$ 2.35  | p =0.07            | p =0.87       | p =0.03    |         | -0.45                   | p =0.01       |
| <i>Muribaculum</i>              | 0.18 $\pm$ 0.09         | 0.23 $\pm$ 0.18  | 0.65 $\pm$ 0.31  | p =0.88            | p =0.00       | p =0.00    |         | 0.04                    | p =0.88       |
| uncl. <i>Prevotellaceae</i>     | 0.88 $\pm$ 0.30         | 0.88 $\pm$ 0.35  | 1.62 $\pm$ 0.40  | p =0.88            | p =0.00       | p =0.00    |         | -0.09                   | p =0.70       |
| <i>Paraprevotella</i>           | 4.61 $\pm$ 2.30         | 4.84 $\pm$ 3.34  | 9.18 $\pm$ 3.40  | p =0.86            | p =0.00       | p =0.01    |         | -0.13                   | p =0.57       |
| uncl. <i>Bacteroidales</i>      | 1.60 $\pm$ 0.37         | 1.49 $\pm$ 0.44  | 2.47 $\pm$ 0.55  | p =0.41            | p =0.00       | p =0.00    |         | -0.12                   | p =0.59       |
| <i>Helicobacter</i>             | 0.16 $\pm$ 0.14         | 0.47 $\pm$ 0.43  | 0.75 $\pm$ 0.70  | p =0.17            | p =0.00       | p =0.41    |         | 0.19                    | p =0.34       |
| uncl. <i>Helicobacteraceae</i>  | 0.01 $\pm$ 0.01         | 0.05 $\pm$ 0.04  | 0.08 $\pm$ 0.06  | p =0.08            | p =0.00       | p =0.19    |         | 0.25                    | p =0.18       |
| <i>Mucispirillum</i>            | 0.26 $\pm$ 0.15         | 0.58 $\pm$ 0.33  | 0.90 $\pm$ 0.53  | p =0.06            | p =0.00       | p =0.12    |         | 0.23                    | p =0.22       |
| <i>Limosilactobacillus</i>      | 0.11 $\pm$ 0.15         | 0.03 $\pm$ 0.09  | 0.00 $\pm$ 0.01  | p =0.07            | p =0.00       | p =0.90    |         | -0.28                   | p =0.13       |
| <i>Lactococcus</i>              | 0.05 $\pm$ 0.04         | 0.11 $\pm$ 0.06  | 0.05 $\pm$ 0.03  | p =0.08            | p =0.89       | p =0.03    |         | 0.42                    | p =0.01       |
| uncl. <i>Lachnospiraceae</i>    | 23.60 $\pm$ 3.68        | 14.80 $\pm$ 1.88 | 13.12 $\pm$ 2.95 | p =0.00            | p =0.00       | p =0.46    |         | -0.62                   | p =0.00       |
| <i>Anaerostipes</i>             | 0.01 $\pm$ 0.01         | 0.00 $\pm$ 0.00  | 0.00 $\pm$ 0.01  | p =0.03            | p =0.01       | p =1.00    |         | -0.48                   | p =0.00       |
| <i>Kineothrix</i>               | 0.17 $\pm$ 0.29         | 0.07 $\pm$ 0.07  | 0.00 $\pm$ 0.00  | p =0.49            | p =0.01       | p =0.00    |         | -0.20                   | p =0.33       |
| <i>Schaedlerella</i>            | 0.21 $\pm$ 0.16         | 0.11 $\pm$ 0.10  | 0.56 $\pm$ 0.35  | p =0.21            | p =0.00       | p =0.00    |         | -0.14                   | p =0.57       |
| <i>Anaerotignum</i>             | 0.11 $\pm$ 0.05         | 0.15 $\pm$ 0.06  | 0.19 $\pm$ 0.07  | p =0.22            | p =0.00       | p =0.20    |         | 0.27                    | p =0.14       |
| uncl. <i>Ruminococcaceae</i>    | 7.22 $\pm$ 1.50         | 9.51 $\pm$ 2.55  | 5.23 $\pm$ 0.53  | p =0.21            | p =0.00       | p =0.00    |         | 0.30                    | p =0.10       |
| <i>Flintibacter</i>             | 1.24 $\pm$ 0.39         | 1.97 $\pm$ 0.57  | 1.41 $\pm$ 0.23  | p =0.02            | p =0.35       | p =0.02    |         | 0.46                    | p =0.01       |
| <i>Clostridium_IV</i>           | 0.07 $\pm$ 0.12         | 0.00 $\pm$ 0.00  | 0.00 $\pm$ 0.00  | p =0.15            | p =0.02       | p =0.46    |         | -0.35                   | p =0.05       |

|                                  |           |            |            |         |         |         |       |         |
|----------------------------------|-----------|------------|------------|---------|---------|---------|-------|---------|
| <i>Neglecta</i>                  | 0.11±0.06 | 0.07±0.05  | 0.34±0.11  | p =0.18 | p =0.00 | p =0.00 | -0.13 | p =0.57 |
| <i>Lawsonibacter</i>             | 0.45±0.25 | 0.59±0.22  | 1.16±0.36  | p =0.31 | p =0.00 | p =0.00 | 0.03  | p =0.91 |
| <i>Ruthenibacterium</i>          | 0.12±0.08 | 0.16±0.12  | 0.31±0.11  | p =0.50 | p =0.00 | p =0.00 | 0.02  | p =0.93 |
| <i>Paludicola</i>                | 0.10±0.09 | 0.11±0.06  | 0.22±0.08  | p =0.76 | p =0.00 | p =0.00 | -0.05 | p =0.87 |
| <i>Dysosmobacter</i>             | 0.53±0.31 | 0.51±0.34  | 0.19±0.17  | p =0.84 | p =0.01 | p =0.02 | -0.05 | p =0.86 |
| <i>Allobaculum</i>               | 3.79±2.59 | 2.06±2.46  | 0.31±0.31  | p =0.20 | p =0.00 | p =0.00 | -0.29 | p =0.12 |
| uncl. <i>Alphaproteobacteria</i> | 0.41±0.23 | 0.59±0.39  | 1.00±0.61  | p =0.49 | p =0.01 | p =0.14 | 0.08  | p =0.73 |
| uncl. <i>Desulfovibrionaceae</i> | 0.73±0.30 | 0.50±0.25  | 0.77±0.22  | p =0.18 | p =0.46 | p =0.02 | -0.39 | p =0.02 |
| <i>Mailhella</i>                 | 8.85±2.15 | 13.31±2.46 | 12.30±1.61 | p =0.01 | p =0.00 | p =0.64 | 0.57  | p =0.00 |
| uncl. <i>Bacteria</i>            | 3.99±1.11 | 4.55±1.20  | 6.83±1.99  | p =0.50 | p =0.00 | p =0.00 | 0.13  | p =0.57 |
| uncl. <i>Opitutae</i>            | 0.00±0.00 | 0.00±0.00  | 0.00±0.01  |         | p =0.03 | p =0.04 | 0.01  | p =0.95 |

---
